# Supplementary figures and images for: Brca1 is required for embryonic development of the mouse cerebral cortex to normal size by preventing apoptosis of early neural progenitors
Source: Oxford University Press journal article supplement (doi:10.1242/dev.033498), 2009-04-29

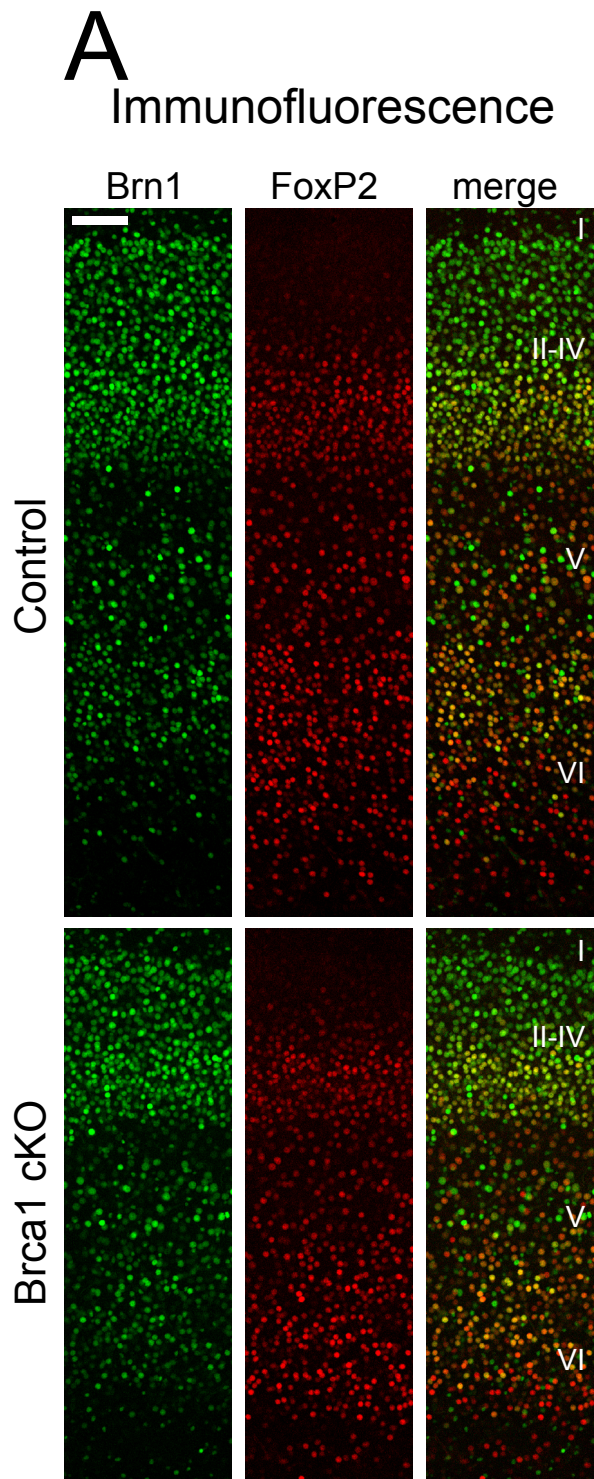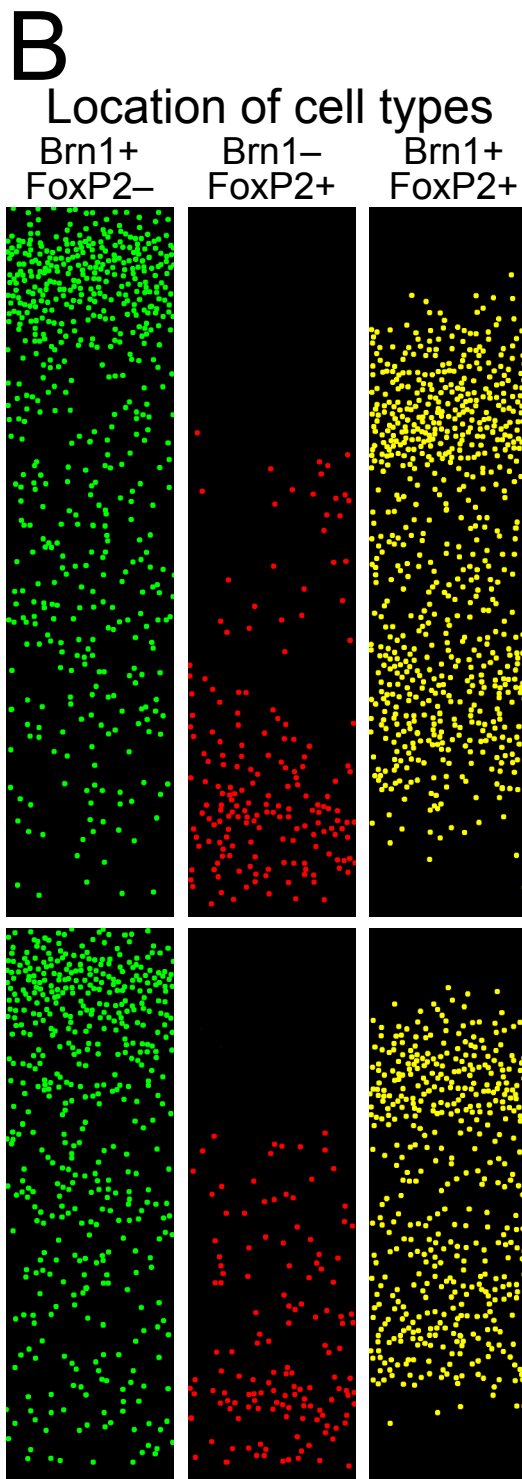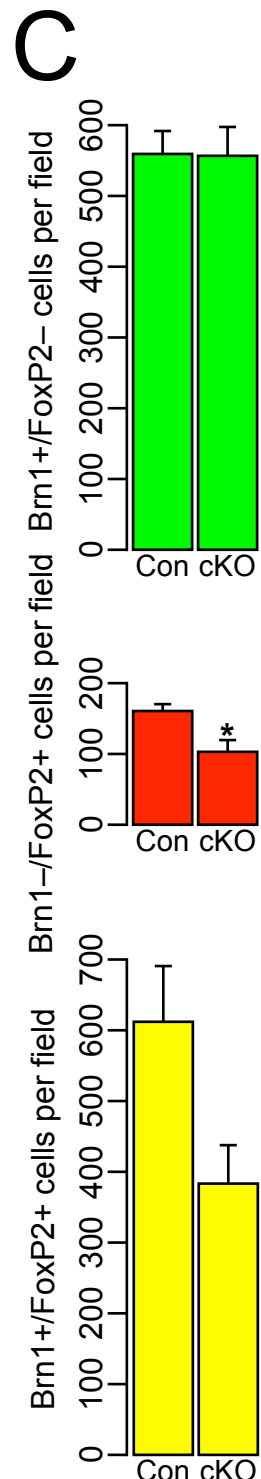

Supplement: dev033498-sup-033498-figs1.pdf [file dev033498-sup-033498-figs1.pdf]

Control

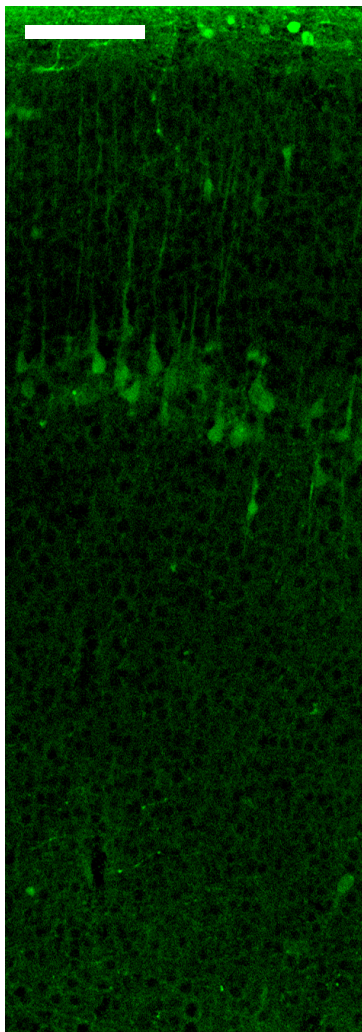

Brca1 cKO

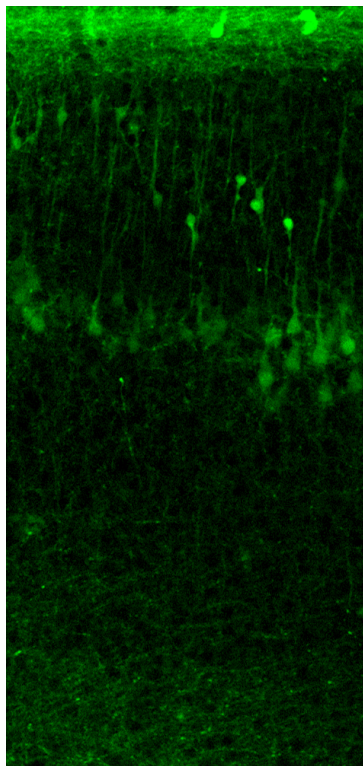

P4.5

Calretinin

Supplement: dev033498-sup-033498-figs2.pdf [file dev033498-sup-033498-figs2.pdf]

DAPI TUNEL

Nestin TUNEL

Pax6

Pax6 TUNEL

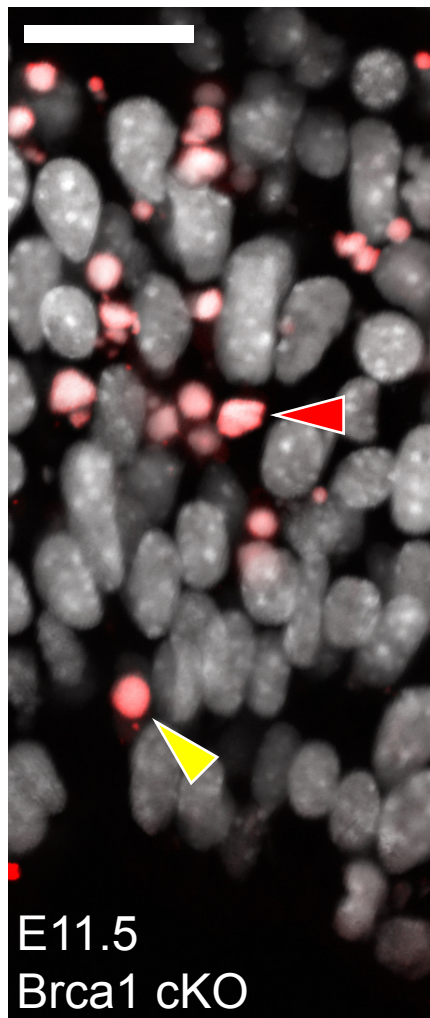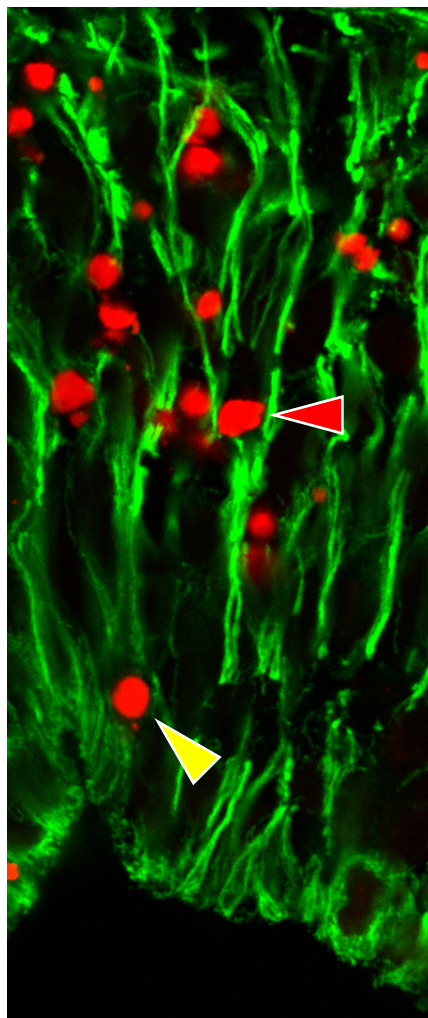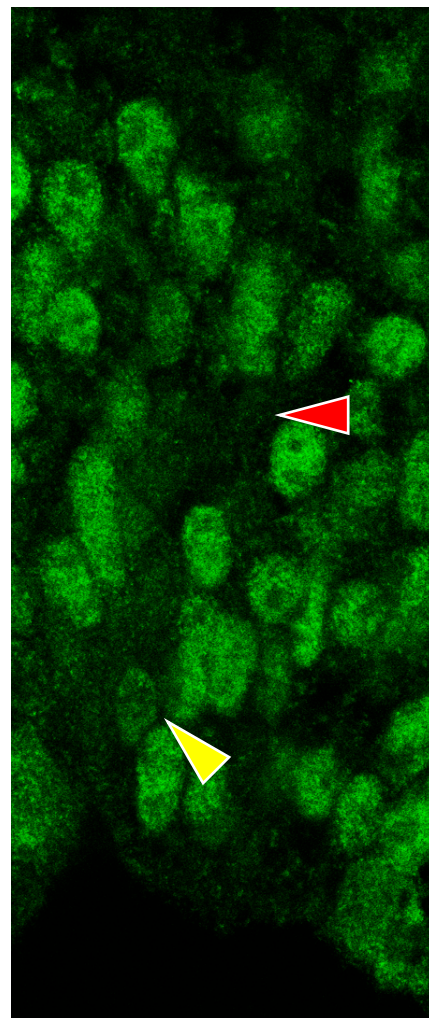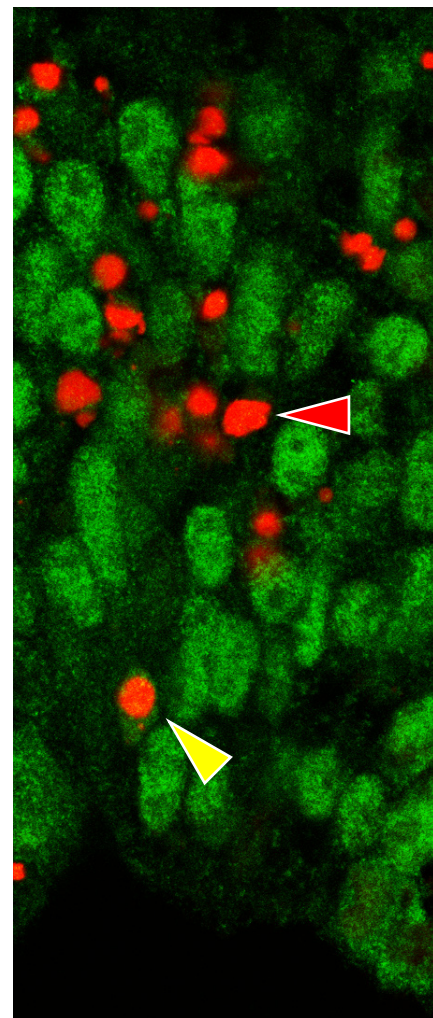

Supplement: dev033498-sup-033498-figs3.pdf [file dev033498-sup-033498-figs3.pdf]
